# Supplementary material
Source: ML conference proceedings conference paper supplement (https://openaccess.thecvf.com/content/CVPR_2020/html/Yan_Disparity-Aware_Domain_Adaptation_CVPR_2020_paper.html)
Supplement: Supplementary file 1 [file Yan_Disparity-Aware_Domain_Adaptation_CVPR_2020_supplemental.pdf]

# Disparity-Aware Domain Adaptation in Stereo Image Restoration — Supplementary File

Bo Yan \*, Chenxi Ma, Bahetiyaer Bare, Weimin Tan  
Shanghai Key Laboratory  
of Intelligent Information Processing,  
School of Computer Science, Fudan University

{byan, cxma17, bahtiyarbari16, wmtan14}@fudan.edu.cn

Steven Hoi  
Salesforce Research Asia  
Singapore Management University  
shoi@salesforce.com

This supplementary file mainly indicates more experimental results of the proposed stereo image restoration method and the compared state-of-the-art methods. We will demonstrate the visual comparisons on super-resolution, deblurring, and denoising tasks respectively.

## 1. Super Resolution

The visual comparison between our approach and other state-of-the-art super-resolution methods, including single image super-resolution SISR (VDSR [4], MemNet [6], EDSR [5], IDN [1]), stereo image SR (StereoSR [2], PASSRnet [8]), RefSR (SRNTT [9]), and video SR methods (SPM-C [7], DUF [3]) works, are shown in Figure 3, Figure 2, Figure 1, Figure 4, Figure 6, and Figure 5. The proposed approach synthesizes finer texture and restores accurate details without distortions, compared to these SR works

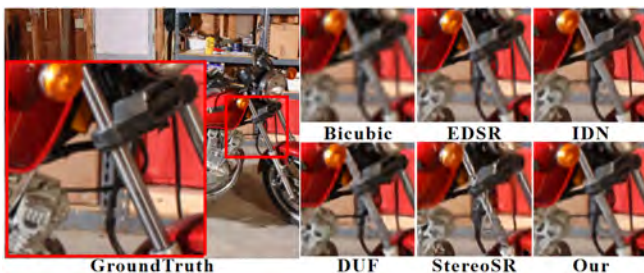

Figure 1: The  $\times 4$  SR results on image "Motorcycle" from Middlebury.

## 2. Deblurring

Figure 7 and Figure 9 denotes the deblurring comparisons under different kernels on Middlebury.

\*This work was supported by NSFC (Grant No.: 61772137).

## 3. Denoising

The denoising results are depicted in Figure 7 and Figure 8.

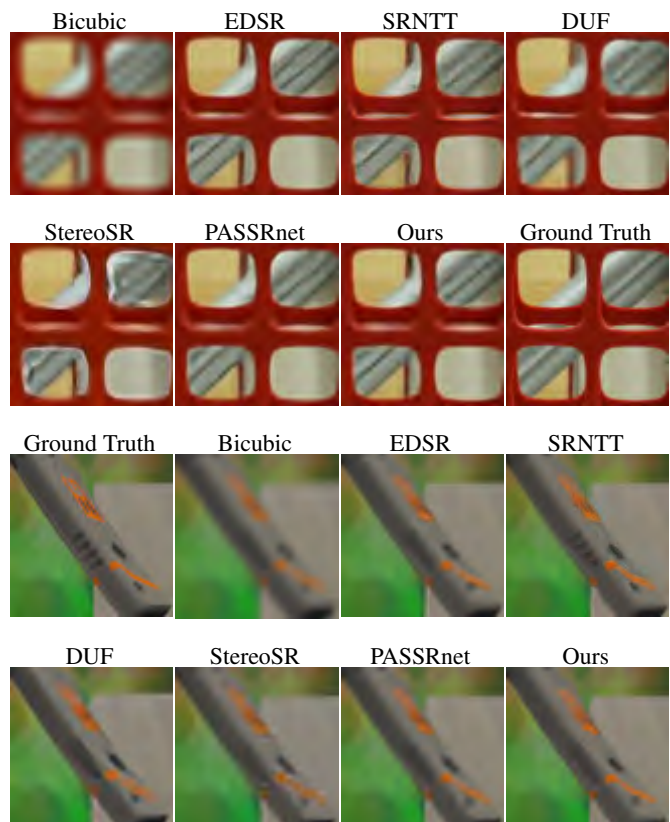

Figure 2: The  $\times 4$  SR results on image "Sword" from Middlebury and image "B0008" from FlyingThings3D.

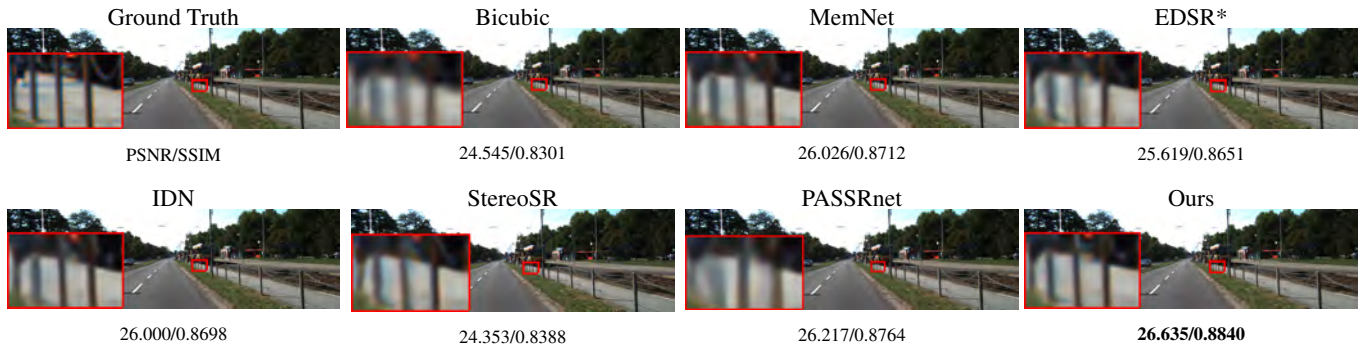

Figure 3: The  $\times 3$  SR results on image "000003\_10" from KITTI 2015. PSNR and SSIM values are shown under each result.

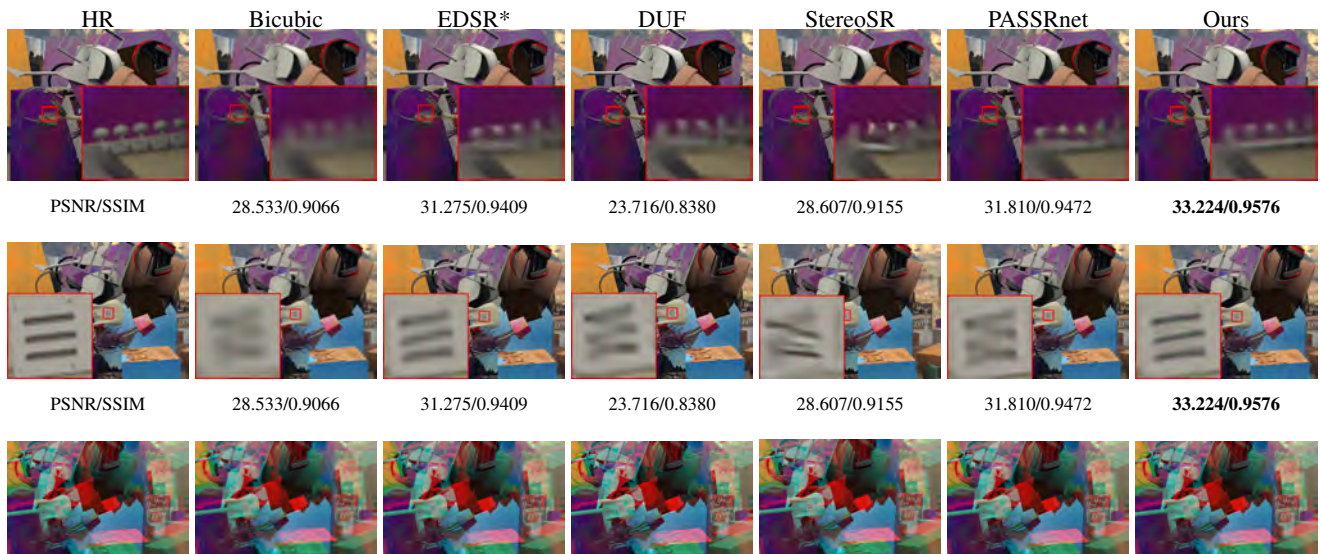

Figure 4: Visual Results on FlyingThings3D dataset. (a) The super-resolved left images "C0010.png", (b) Anaglyph images "C0007.png", viewed with red-green glasses. (c) The  $\times 4$  SR results on left image "C0007.png" from FlyingThings3D dataset.

## References

- [1] Zheng Hui, Xiumei Wang, and Xinbo Gao. Fast and accurate single image super-resolution via information distillation network. In *Proceedings of the IEEE Conference on Computer Vision and Pattern Recognition*, pages 723–731, 2018. 1
- [2] D. S. Jeon, S. Baek, I. Choi, and M. H. Kim. Enhancing the spatial resolution of stereo images using a parallax prior. In *2018 IEEE/CVF Conference on Computer Vision and Pattern Recognition*, pages 1721–1730, June 2018. 1
- [3] Younghyun Jo, Seung Wug Oh, Jaeyeon Kang, and Seon Joo Kim. Deep video super-resolution network using dynamic upsampling filters without explicit motion compensation. In *The IEEE Conference on Computer Vision and Pattern Recognition (CVPR)*, 2018. 1
- [4] Jiwon Kim, Jung Kwon Lee, and Kyoung Mu Lee. Accurate image super-resolution using very deep convolutional networks. In *Computer Vision and Pattern Recognition*, pages 1646–1654, 2016. 1
- [5] Bee Lim, Sanghyun Son, Heewon Kim, Seungjun Nah, and Kyoung Mu Lee. Enhanced deep residual networks for single image super-resolution. In *The IEEE conference on computer vision and pattern recognition (CVPR) workshops*, volume 1, page 4, 2017. 1
- [6] Ying Tai, Jian Yang, Xiaoming Liu, and Chunyan Xu. Memnet: A persistent memory network for image restoration. In *IEEE International Conference on Computer Vision*, pages 4549–4557, 2017. 1
- [7] Xin Tao, Hongyun Gao, Renjie Liao, Jue Wang, and Jiaya Jia. Detail-revealing deep video super-resolution.



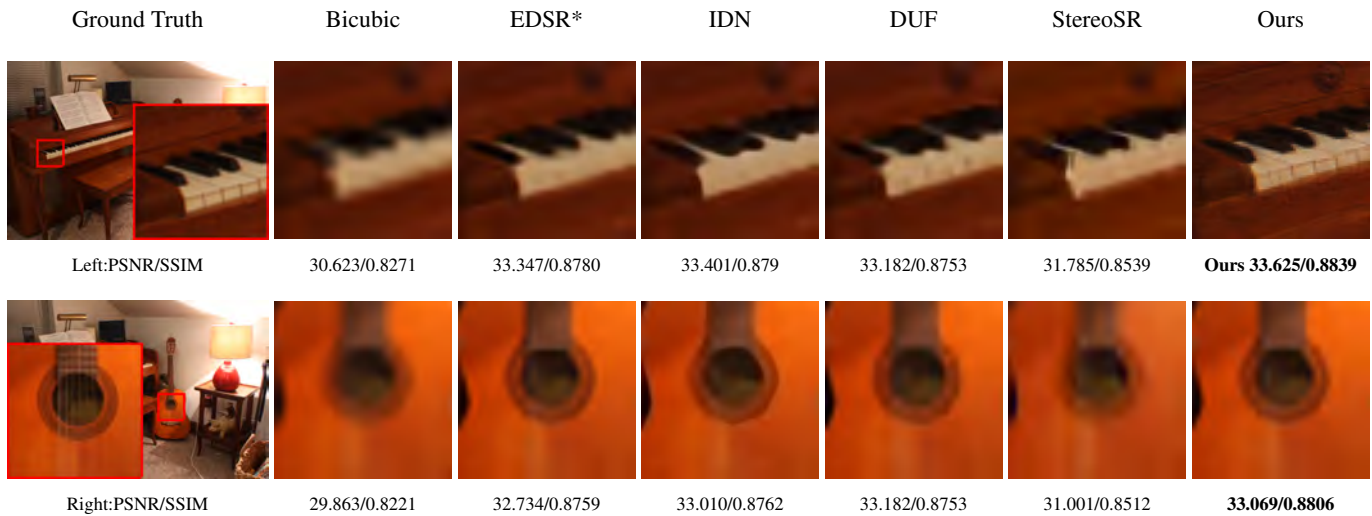

Figure 5: The  $\times 4$  left and right SR results on image "Piano" from Middlebury. The results at the upper row are the super-resolved left images and the results at the lower row are the right images.

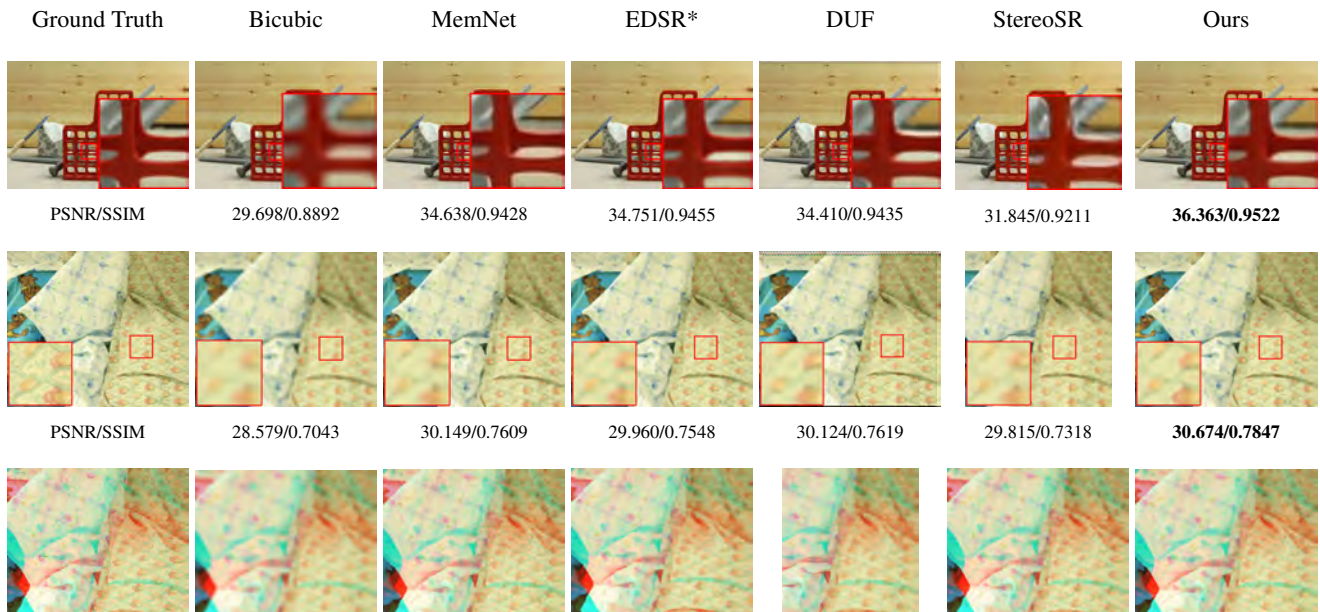

Figure 6: The  $\times 4$  SR results on image "Cloth" and "Sword" from Middlebury. PSNR and SSIM values are shown under each result. (a), (b) The super-resolved left images of different SR methods, (c) Anaglyph images of the super-resolved stereo pairs, the images should be viewed with red-green glasses.

In *Proceedings of the IEEE International Conference on Computer Vision*, pages 4472–4480, 2017. 1

[8] Longguang Wang, Yingqian Wang, Zhengfa Liang, Zaiping Lin, Jungang Yang, Wei An, and Yulan Guo. Learning parallax attention for stereo image super-resolution. In *Proceedings of the IEEE Conference on Computer Vision and Pattern Recognition*, pages 12250–12259, 2019. 1

[9] Zhifei Zhang, Zhaowen Wang, Zhe Lin, and Hairong Qi. Image super-resolution by neural texture transfer. In *Proceedings of the IEEE Conference on Computer Vision and Pattern Recognition*, pages 7982–7991, 2019. 1

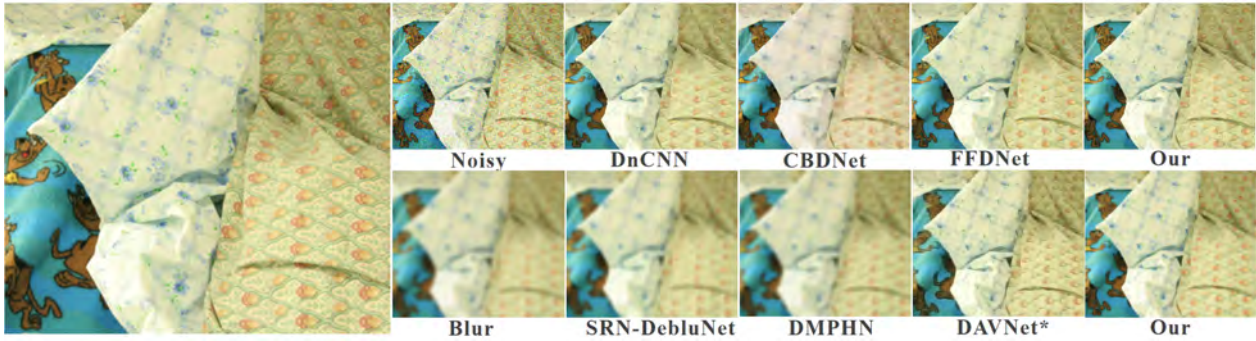

Figure 7: The denoising and deblurring results on images "Cloth.png" from Middlebury. The noise level is 30 and the blur kernel width  $\sigma = 3.6$ .

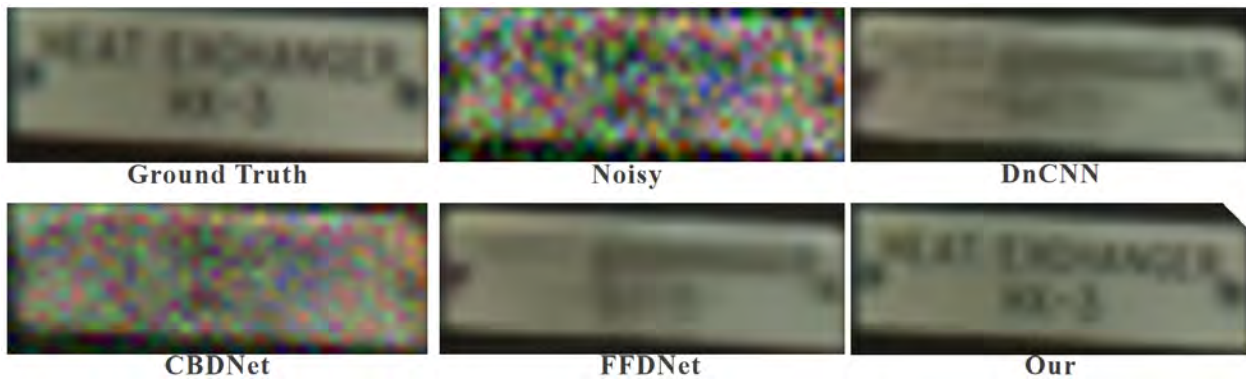

Figure 8: The denoising results on images "Pipes.png" from Middlebury with noise level 30.

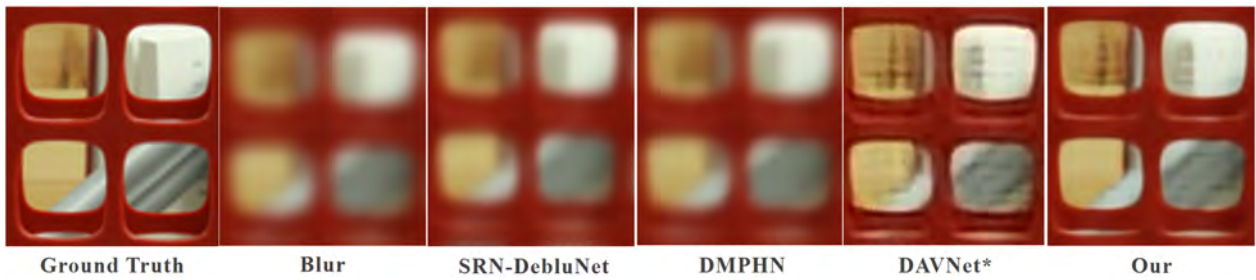

Figure 9: The deblurring results on images "Swords.png" from Middlebury with kernel width  $\sigma = 3.6$ .
